# Supplementary material for: Ulp1 Regulates Cell Proliferation Through INO1 in <em>Pichia pastoris</em>
Source: Preprints.org preprint supplement (doi:10.20944/preprints202410.1797.v1), 2024-10-23
Supplement: Supplementary file 1 [file supplementary]

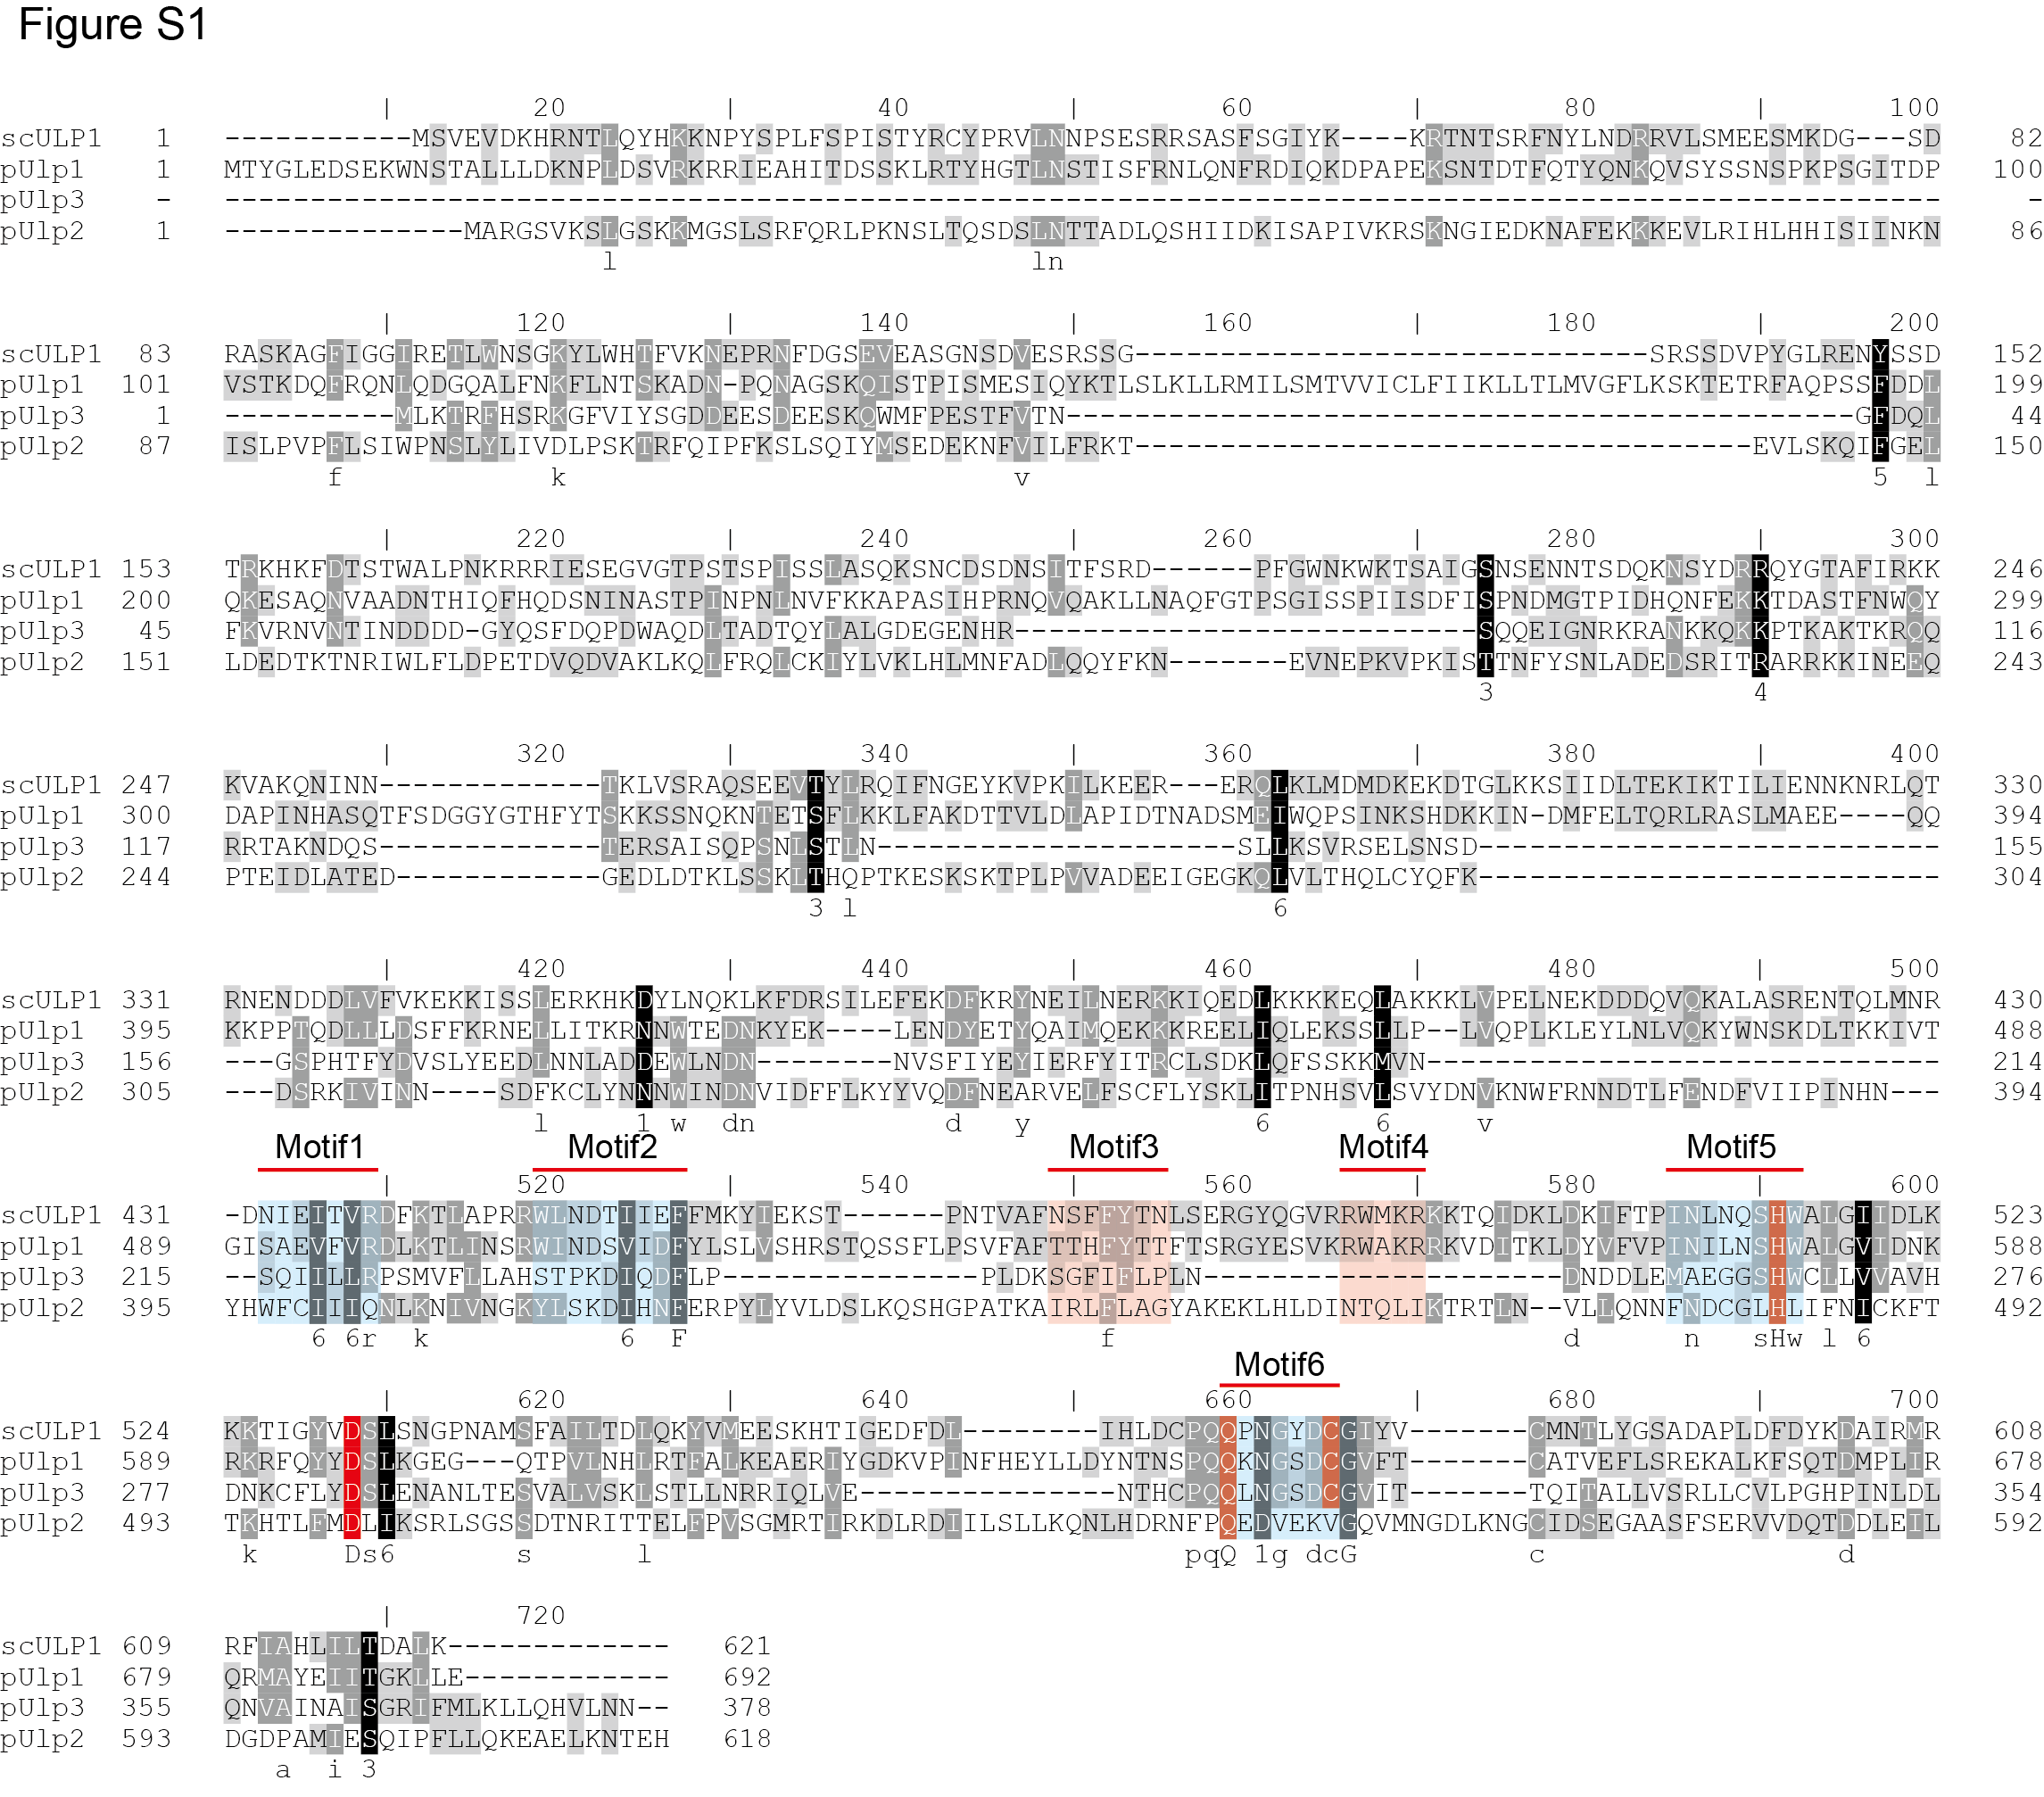


**Figure S1. Amino acid sequence alignment of scUlp1, pUlp1, pUlp2, and pUlp3.** scUlp1 refers to the Ulp1 protein from *Saccharomyces cerevisiae*. pUlp1, pUlp2, and pUlp3 are the Ulp proteins from *Pichia pastoris*, named based on their sequence similarity to the Ulp1 protein of *Saccharomyces cerevisiae*. Conserved motifs and amino acids are highlighted with red and blue color.
